# Supplementary material for: Transcriptional adaptation of olfactory sensory neurons to GPCR identity and activity
Source: PubMed Central journal article supplement (PMC9132991; doi:10.1038/s41467-022-30511-4), 2022-05-25
Supplement: 41467_2022_30511_MOESM3_ESM.pdf [file 41467_2022_30511_MOESM3_ESM.pdf]

**Title:** Supplementary Data 1.

**Description:** Differentially expressed genes in Olfr16 and Olfr151- transcribing populations after agonist exposure. Fold change of the strongly modulated genes. Selection criteria: adjusted p-value < 0.1 and  $\log_2(\text{fold change}) < -0.5$  (=downregulated genes) or adjusted p-value < 0.1 and  $\log_2(\text{fold change}) > 0.5$  (=upregulated genes). P-values: Wald test (two-tailed), BenjaminiHochberg adjusted.

**Title:** Supplementary Data 2.

**Description:** Differentially expressed genes between Olfr151- and Olfr16-transcribing populations at basal state. Gene expression fold differences of genes identified as being differentially expressed between Olfr151- and Olfr16-transcribing populations, at basal state. Selection criteria: Adjusted p-value < 0.1 and fold difference > 4. P-values: Wald test (two-tailed), BenjaminiHochberg adjusted.

**Title:** Supplementary Data 3.

**Description:** Genes that were strongly modulated after activation in one OSN population and not in the other. Gene expression fold change after ligand exposure, and OSN population specificity assessment. Selection criteria: Adjusted p-value < 0.1,  $\log_2(\text{fold change}) < -2$  (=downregulated genes); adjusted p-value < 0.1,  $\log_2(\text{fold change}) > 2$  (=upregulated genes) P-values: Wald test (two-tailed), BenjaminiHochberg adjusted. Specific to the population: gene that was not detected in the other population.
